# Supplementary material for: Tissue Expression Difference between mRNAs and lncRNAs
Source: MDPI journal article supplement (doi:10.3390/ijms19113416), 2018-10-31
Supplement: s1 [file s1]

**Table S4.** SNs, SPs, ACCs, and MCCs obtained by the IFS method and 1-NN, SVM or LR algorithm.

**(1) SNs, SPs, ACCs, and MCCs obtained by the IFS method and 1-NN algorithm.**

| Number of features | SN    | SP    | ACC   | MCC   |
|--------------------|-------|-------|-------|-------|
| 4                  | 0.850 | 0.860 | 0.856 | 0.703 |
| 5                  | 0.859 | 0.865 | 0.863 | 0.717 |
| 6                  | 0.874 | 0.869 | 0.871 | 0.734 |
| 7                  | 0.876 | 0.868 | 0.871 | 0.736 |
| 8                  | 0.885 | 0.869 | 0.875 | 0.744 |
| 9                  | 0.885 | 0.869 | 0.875 | 0.745 |
| 10                 | 0.918 | 0.894 | 0.903 | 0.803 |
| 11                 | 0.918 | 0.894 | 0.903 | 0.802 |
| 12                 | 0.919 | 0.895 | 0.904 | 0.804 |
| 13                 | 0.921 | 0.898 | 0.907 | 0.810 |
| 14                 | 0.921 | 0.897 | 0.906 | 0.808 |
| 15                 | 0.923 | 0.896 | 0.907 | 0.809 |
| 16                 | 0.923 | 0.896 | 0.907 | 0.809 |
| 17                 | 0.922 | 0.895 | 0.906 | 0.807 |
| 18                 | 0.923 | 0.895 | 0.906 | 0.807 |
| 19                 | 0.922 | 0.895 | 0.905 | 0.807 |
| 20                 | 0.922 | 0.895 | 0.906 | 0.807 |
| 21                 | 0.922 | 0.897 | 0.907 | 0.809 |

|    |       |       |       |       |
|----|-------|-------|-------|-------|
| 22 | 0.924 | 0.896 | 0.907 | 0.810 |
| 23 | 0.926 | 0.898 | 0.909 | 0.815 |
| 24 | 0.927 | 0.898 | 0.909 | 0.815 |
| 25 | 0.928 | 0.898 | 0.910 | 0.816 |
| 26 | 0.928 | 0.898 | 0.910 | 0.815 |
| 27 | 0.927 | 0.897 | 0.909 | 0.815 |
| 28 | 0.928 | 0.897 | 0.909 | 0.815 |
| 29 | 0.929 | 0.897 | 0.910 | 0.816 |
| 30 | 0.928 | 0.897 | 0.910 | 0.816 |
| 31 | 0.929 | 0.897 | 0.910 | 0.816 |
| 32 | 0.929 | 0.897 | 0.910 | 0.816 |
| 33 | 0.929 | 0.897 | 0.910 | 0.816 |
| 34 | 0.929 | 0.897 | 0.909 | 0.815 |
| 35 | 0.929 | 0.897 | 0.909 | 0.815 |
| 36 | 0.929 | 0.897 | 0.910 | 0.816 |
| 37 | 0.928 | 0.897 | 0.909 | 0.815 |
| 38 | 0.928 | 0.897 | 0.909 | 0.815 |
| 39 | 0.928 | 0.897 | 0.909 | 0.815 |
| 40 | 0.928 | 0.897 | 0.909 | 0.815 |
| 41 | 0.928 | 0.897 | 0.910 | 0.816 |
| 42 | 0.929 | 0.897 | 0.910 | 0.816 |
| 43 | 0.928 | 0.897 | 0.909 | 0.815 |

|    |       |       |       |       |
|----|-------|-------|-------|-------|
| 44 | 0.930 | 0.896 | 0.910 | 0.816 |
| 45 | 0.929 | 0.896 | 0.909 | 0.815 |
| 46 | 0.930 | 0.896 | 0.910 | 0.816 |
| 47 | 0.931 | 0.896 | 0.910 | 0.816 |
| 48 | 0.931 | 0.896 | 0.910 | 0.816 |
| 49 | 0.931 | 0.895 | 0.909 | 0.815 |
| 50 | 0.931 | 0.895 | 0.909 | 0.815 |
| 51 | 0.931 | 0.895 | 0.910 | 0.816 |
| 52 | 0.932 | 0.895 | 0.910 | 0.816 |
| 53 | 0.931 | 0.895 | 0.909 | 0.816 |
| 54 | 0.931 | 0.895 | 0.910 | 0.816 |
| 55 | 0.930 | 0.895 | 0.909 | 0.815 |
| 56 | 0.931 | 0.896 | 0.910 | 0.816 |
| 57 | 0.932 | 0.896 | 0.910 | 0.817 |
| 58 | 0.932 | 0.896 | 0.910 | 0.817 |
| 59 | 0.931 | 0.896 | 0.910 | 0.817 |
| 60 | 0.932 | 0.896 | 0.910 | 0.817 |
| 61 | 0.932 | 0.896 | 0.910 | 0.817 |
| 62 | 0.932 | 0.895 | 0.910 | 0.816 |
| 63 | 0.932 | 0.895 | 0.910 | 0.817 |
| 64 | 0.932 | 0.896 | 0.910 | 0.817 |
| 65 | 0.932 | 0.896 | 0.910 | 0.817 |

|    |       |       |       |       |
|----|-------|-------|-------|-------|
| 66 | 0.931 | 0.896 | 0.910 | 0.817 |
| 67 | 0.932 | 0.896 | 0.910 | 0.817 |
| 68 | 0.932 | 0.896 | 0.910 | 0.818 |
| 69 | 0.932 | 0.896 | 0.911 | 0.818 |
| 70 | 0.931 | 0.896 | 0.910 | 0.817 |
| 71 | 0.933 | 0.896 | 0.910 | 0.818 |

**(2) SNs, SPs, ACCs, and MCCs obtained by the IFS method and SVM algorithm.**

| Number of features | SN    | SP    | ACC   | MCC   |
|--------------------|-------|-------|-------|-------|
| 4                  | 0.705 | 0.859 | 0.798 | 0.574 |
| 5                  | 0.709 | 0.860 | 0.800 | 0.577 |
| 6                  | 0.711 | 0.858 | 0.800 | 0.578 |
| 7                  | 0.712 | 0.858 | 0.801 | 0.579 |
| 8                  | 0.712 | 0.858 | 0.801 | 0.579 |
| 9                  | 0.714 | 0.858 | 0.801 | 0.580 |
| 10                 | 0.717 | 0.860 | 0.803 | 0.584 |
| 11                 | 0.718 | 0.860 | 0.804 | 0.586 |
| 12                 | 0.719 | 0.860 | 0.804 | 0.586 |
| 13                 | 0.722 | 0.862 | 0.807 | 0.592 |
| 14                 | 0.725 | 0.862 | 0.808 | 0.595 |
| 15                 | 0.727 | 0.862 | 0.809 | 0.596 |
| 16                 | 0.728 | 0.862 | 0.809 | 0.597 |
| 17                 | 0.729 | 0.862 | 0.809 | 0.598 |

|    |       |       |       |       |
|----|-------|-------|-------|-------|
| 18 | 0.729 | 0.862 | 0.809 | 0.598 |
| 19 | 0.730 | 0.862 | 0.810 | 0.599 |
| 20 | 0.734 | 0.862 | 0.812 | 0.603 |
| 21 | 0.735 | 0.862 | 0.812 | 0.604 |
| 22 | 0.737 | 0.862 | 0.813 | 0.606 |
| 23 | 0.739 | 0.862 | 0.813 | 0.607 |
| 24 | 0.739 | 0.863 | 0.814 | 0.608 |
| 25 | 0.740 | 0.863 | 0.814 | 0.608 |
| 26 | 0.740 | 0.863 | 0.814 | 0.608 |
| 27 | 0.741 | 0.863 | 0.814 | 0.609 |
| 28 | 0.741 | 0.862 | 0.814 | 0.609 |
| 29 | 0.741 | 0.862 | 0.814 | 0.609 |
| 30 | 0.741 | 0.862 | 0.814 | 0.609 |
| 31 | 0.742 | 0.862 | 0.815 | 0.609 |
| 32 | 0.742 | 0.862 | 0.815 | 0.610 |
| 33 | 0.742 | 0.862 | 0.815 | 0.610 |
| 34 | 0.742 | 0.862 | 0.815 | 0.610 |
| 35 | 0.742 | 0.862 | 0.815 | 0.610 |
| 36 | 0.743 | 0.862 | 0.815 | 0.610 |
| 37 | 0.743 | 0.863 | 0.815 | 0.611 |
| 38 | 0.744 | 0.863 | 0.816 | 0.612 |
| 39 | 0.744 | 0.863 | 0.816 | 0.612 |

|    |       |       |       |       |
|----|-------|-------|-------|-------|
| 40 | 0.744 | 0.863 | 0.816 | 0.612 |
| 41 | 0.744 | 0.863 | 0.816 | 0.612 |
| 42 | 0.744 | 0.863 | 0.816 | 0.612 |
| 43 | 0.744 | 0.863 | 0.816 | 0.612 |
| 44 | 0.744 | 0.863 | 0.816 | 0.613 |
| 45 | 0.745 | 0.863 | 0.816 | 0.613 |
| 46 | 0.745 | 0.863 | 0.816 | 0.613 |
| 47 | 0.746 | 0.863 | 0.817 | 0.614 |
| 48 | 0.746 | 0.863 | 0.817 | 0.614 |
| 49 | 0.746 | 0.863 | 0.817 | 0.614 |
| 50 | 0.747 | 0.863 | 0.817 | 0.615 |
| 51 | 0.748 | 0.862 | 0.817 | 0.615 |
| 52 | 0.748 | 0.862 | 0.817 | 0.615 |
| 53 | 0.748 | 0.862 | 0.817 | 0.615 |
| 54 | 0.749 | 0.862 | 0.818 | 0.616 |
| 55 | 0.749 | 0.862 | 0.818 | 0.616 |
| 56 | 0.750 | 0.862 | 0.818 | 0.616 |
| 57 | 0.750 | 0.862 | 0.818 | 0.617 |
| 58 | 0.751 | 0.862 | 0.818 | 0.618 |
| 59 | 0.751 | 0.862 | 0.818 | 0.618 |
| 60 | 0.751 | 0.862 | 0.818 | 0.618 |
| 61 | 0.751 | 0.862 | 0.818 | 0.618 |

|    |       |       |       |       |
|----|-------|-------|-------|-------|
| 62 | 0.752 | 0.862 | 0.819 | 0.619 |
| 63 | 0.753 | 0.862 | 0.819 | 0.619 |
| 64 | 0.754 | 0.862 | 0.819 | 0.619 |
| 65 | 0.754 | 0.862 | 0.819 | 0.620 |
| 66 | 0.755 | 0.861 | 0.819 | 0.620 |
| 67 | 0.755 | 0.862 | 0.820 | 0.621 |
| 68 | 0.755 | 0.861 | 0.820 | 0.621 |
| 69 | 0.756 | 0.861 | 0.820 | 0.621 |
| 70 | 0.757 | 0.861 | 0.820 | 0.622 |
| 71 | 0.758 | 0.861 | 0.820 | 0.622 |

**(3) SNs, SPs, ACCs, and MCCs obtained by the IFS method and LR algorithm.**

| <b>Number of features</b> | <b>SN</b> | <b>SP</b> | <b>ACC</b> | <b>MCC</b> |
|---------------------------|-----------|-----------|------------|------------|
| 4                         | 0.898     | 0.844     | 0.865      | 0.729      |
| 5                         | 0.896     | 0.849     | 0.868      | 0.733      |
| 6                         | 0.951     | 0.812     | 0.867      | 0.746      |
| 7                         | 0.954     | 0.814     | 0.869      | 0.751      |
| 8                         | 0.906     | 0.839     | 0.865      | 0.731      |
| 9                         | 0.796     | 0.873     | 0.843      | 0.670      |
| 10                        | 0.947     | 0.840     | 0.883      | 0.771      |
| 11                        | 0.949     | 0.846     | 0.887      | 0.779      |
| 12                        | 0.922     | 0.876     | 0.894      | 0.786      |
| 13                        | 0.929     | 0.885     | 0.902      | 0.802      |

|    |       |       |       |       |
|----|-------|-------|-------|-------|
| 14 | 0.889 | 0.897 | 0.894 | 0.780 |
| 15 | 0.881 | 0.897 | 0.890 | 0.773 |
| 16 | 0.903 | 0.889 | 0.894 | 0.783 |
| 17 | 0.898 | 0.891 | 0.893 | 0.781 |
| 18 | 0.933 | 0.875 | 0.898 | 0.795 |
| 19 | 0.944 | 0.876 | 0.903 | 0.806 |
| 20 | 0.915 | 0.881 | 0.894 | 0.785 |
| 21 | 0.830 | 0.906 | 0.876 | 0.740 |
| 22 | 0.789 | 0.907 | 0.860 | 0.706 |
| 23 | 0.758 | 0.897 | 0.842 | 0.666 |
| 24 | 0.761 | 0.892 | 0.840 | 0.662 |
| 25 | 0.799 | 0.879 | 0.848 | 0.680 |
| 26 | 0.804 | 0.878 | 0.849 | 0.683 |
| 27 | 0.783 | 0.880 | 0.842 | 0.667 |
| 28 | 0.774 | 0.881 | 0.839 | 0.661 |
| 29 | 0.793 | 0.879 | 0.845 | 0.675 |
| 30 | 0.825 | 0.870 | 0.852 | 0.692 |
| 31 | 0.844 | 0.868 | 0.858 | 0.706 |
| 32 | 0.921 | 0.866 | 0.888 | 0.774 |
| 33 | 0.932 | 0.882 | 0.902 | 0.802 |
| 34 | 0.936 | 0.878 | 0.901 | 0.802 |
| 35 | 0.940 | 0.876 | 0.901 | 0.802 |



|    |       |       |       |       |
|----|-------|-------|-------|-------|
| 36 | 0.936 | 0.869 | 0.895 | 0.791 |
| 37 | 0.908 | 0.879 | 0.891 | 0.777 |
| 38 | 0.920 | 0.878 | 0.894 | 0.786 |
| 39 | 0.884 | 0.867 | 0.874 | 0.742 |
| 40 | 0.864 | 0.878 | 0.873 | 0.737 |
| 41 | 0.890 | 0.877 | 0.882 | 0.758 |
| 42 | 0.842 | 0.883 | 0.867 | 0.723 |
| 43 | 0.862 | 0.885 | 0.876 | 0.742 |
| 44 | 0.745 | 0.898 | 0.837 | 0.656 |
| 45 | 0.749 | 0.895 | 0.837 | 0.656 |
| 46 | 0.759 | 0.889 | 0.837 | 0.656 |
| 47 | 0.807 | 0.881 | 0.852 | 0.689 |
| 48 | 0.708 | 0.887 | 0.816 | 0.611 |
| 49 | 0.762 | 0.858 | 0.820 | 0.623 |
| 50 | 0.784 | 0.842 | 0.819 | 0.624 |
| 51 | 0.806 | 0.849 | 0.832 | 0.651 |
| 52 | 0.868 | 0.816 | 0.836 | 0.671 |
| 53 | 0.899 | 0.804 | 0.841 | 0.688 |
| 54 | 0.897 | 0.824 | 0.853 | 0.707 |
| 55 | 0.940 | 0.773 | 0.839 | 0.697 |
| 56 | 0.942 | 0.757 | 0.830 | 0.685 |
| 57 | 0.922 | 0.792 | 0.844 | 0.699 |

|    |       |       |       |       |
|----|-------|-------|-------|-------|
| 58 | 0.910 | 0.882 | 0.893 | 0.781 |
| 59 | 0.933 | 0.877 | 0.899 | 0.798 |
| 60 | 0.931 | 0.880 | 0.900 | 0.799 |
| 61 | 0.930 | 0.882 | 0.901 | 0.800 |
| 62 | 0.916 | 0.883 | 0.896 | 0.788 |
| 63 | 0.880 | 0.890 | 0.886 | 0.764 |
| 64 | 0.875 | 0.892 | 0.886 | 0.763 |
| 65 | 0.925 | 0.883 | 0.900 | 0.797 |
| 66 | 0.905 | 0.887 | 0.894 | 0.783 |
| 67 | 0.852 | 0.897 | 0.879 | 0.748 |
| 68 | 0.888 | 0.887 | 0.887 | 0.767 |
| 69 | 0.861 | 0.894 | 0.881 | 0.751 |
| 70 | 0.800 | 0.904 | 0.863 | 0.712 |
| 71 | 0.777 | 0.908 | 0.856 | 0.696 |
