# Supplementary material for: Tissue Expression Difference between mRNAs and lncRNAs
Source: MDPI journal article supplement (doi:10.3390/ijms19113416), 2018-10-31
Supplement: s1 [file s1]

**Table S1.** mRMR feature list yielded by the mRMR method.

| <b>Rank</b> | <b>Feature name</b>                  |
|-------------|--------------------------------------|
| 1           | Expression specificity               |
| 2           | Intestinal epithelial cell           |
| 3           | Neutrophil                           |
| 4           | Hepatocyte                           |
| 5           | Mast cell                            |
| 6           | Fibroblast of the conjunctiva        |
| 7           | Reticulocyte                         |
| 8           | Mesenchymal cell                     |
| 9           | Lymphocyte of b lineage              |
| 10          | Neuronal stem cell                   |
| 11          | Macrophage                           |
| 12          | Pericyte cell                        |
| 13          | Max cpm in all facet                 |
| 14          | Endothelial cell of lymphatic vessel |
| 15          | Natural killer cell                  |
| 16          | Chondrocyte                          |
| 17          | Placental epithelial cell            |
| 18          | Cardiac myocyte                      |
| 19          | T cell                               |
| 20          | Epithelial cell of prostate          |

|    |                                      |
|----|--------------------------------------|
| 21 | Monocyte                             |
| 22 | Mesothelial cell                     |
| 23 | Neuron                               |
| 24 | Dendritic cell                       |
| 25 | Corneal epithelial cell              |
| 26 | Fibroblast of lymphatic vessel       |
| 27 | Basophil                             |
| 28 | Fat cell                             |
| 29 | Melanocyte                           |
| 30 | Tendon cell                          |
| 31 | Bronchial smooth muscle cell         |
| 32 | Epithelial cell of malassez          |
| 33 | Fibroblast of choroid plexus         |
| 34 | Acinar cell                          |
| 35 | Trabecular meshwork cell             |
| 36 | Endothelial cell of hepatic sinusoid |
| 37 | Mammary epithelial cell              |
| 38 | Sensory epithelial cell              |
| 39 | Smooth muscle cell of the esophagus  |
| 40 | Gingival epithelial cell             |
| 41 | Hepatic stellate cell                |
| 42 | Preadipocyte                         |

|    |                                        |
|----|----------------------------------------|
| 43 | Keratocyte                             |
| 44 | Retinal pigment epithelial cell        |
| 45 | Hair follicle cell                     |
| 46 | Lens epithelial cell                   |
| 47 | Urothelial cell                        |
| 48 | Amniotic epithelial cell               |
| 49 | Blood vessel endothelial cell          |
| 50 | Vascular associated smooth muscle cell |
| 51 | Fibroblast of gingiva                  |
| 52 | Myoblast                               |
| 53 | Respiratory epithelial cell            |
| 54 | Keratinocyte                           |
| 55 | Uterine smooth muscle cell             |
| 56 | Kidney epithelial cell                 |
| 57 | Smooth muscle cell of trachea          |
| 58 | Astrocyte                              |
| 59 | Epithelial cell of esophagus           |
| 60 | Fibroblast of pulmonary artery         |
| 61 | Cardiac fibroblast                     |
| 62 | Ciliated epithelial cell               |
| 63 | Skin fibroblast                        |
| 64 | Osteoblast                             |

|    |                                           |
|----|-------------------------------------------|
| 65 | Smooth muscle cell of prostate            |
| 66 | Fibroblast of periodontium                |
| 67 | Skeletal muscle cell                      |
| 68 | Iris pigment epithelial cell              |
| 69 | Stromal cell                              |
| 70 | Enteric smooth muscle cell                |
| 71 | Fibroblast of tunica adventitia of artery |
