# Supplementary material for: Tissue Expression Difference between mRNAs and lncRNAs
Source: MDPI journal article supplement (doi:10.3390/ijms19113416), 2018-10-31
Supplement: s1 [file s1]

**Table S3.** SNs, SPs, ACCs, and MCCs obtained by the IFS method and RIPPER algorithm.

| Number of features | SN    | SP    | ACC   | MCC   |
|--------------------|-------|-------|-------|-------|
| 4                  | 0.925 | 0.903 | 0.912 | 0.819 |
| 5                  | 0.934 | 0.907 | 0.917 | 0.831 |
| 6                  | 0.936 | 0.914 | 0.923 | 0.842 |
| 7                  | 0.934 | 0.916 | 0.923 | 0.842 |
| 8                  | 0.934 | 0.920 | 0.926 | 0.847 |
| 9                  | 0.932 | 0.920 | 0.925 | 0.844 |
| 10                 | 0.945 | 0.937 | 0.940 | 0.876 |
| 11                 | 0.945 | 0.935 | 0.939 | 0.874 |
| 12                 | 0.948 | 0.938 | 0.942 | 0.880 |
| 13                 | 0.946 | 0.942 | 0.943 | 0.883 |
| 14                 | 0.949 | 0.938 | 0.942 | 0.880 |
| 15                 | 0.946 | 0.941 | 0.943 | 0.882 |
| 16                 | 0.946 | 0.938 | 0.941 | 0.879 |
| 17                 | 0.947 | 0.941 | 0.943 | 0.883 |
| 18                 | 0.946 | 0.940 | 0.942 | 0.881 |
| 19                 | 0.949 | 0.938 | 0.943 | 0.881 |
| 20                 | 0.948 | 0.939 | 0.942 | 0.881 |
| 21                 | 0.946 | 0.941 | 0.943 | 0.882 |
| 22                 | 0.949 | 0.941 | 0.944 | 0.884 |
| 23                 | 0.949 | 0.939 | 0.943 | 0.883 |
| 24                 | 0.951 | 0.942 | 0.945 | 0.887 |
| 25                 | 0.950 | 0.939 | 0.943 | 0.882 |
| 26                 | 0.950 | 0.941 | 0.945 | 0.885 |
| 27                 | 0.949 | 0.942 | 0.945 | 0.886 |
| 28                 | 0.950 | 0.939 | 0.944 | 0.883 |
| 29                 | 0.949 | 0.940 | 0.944 | 0.884 |
| 30                 | 0.949 | 0.939 | 0.943 | 0.882 |
| 31                 | 0.947 | 0.941 | 0.943 | 0.883 |
| 32                 | 0.951 | 0.939 | 0.944 | 0.883 |
| 33                 | 0.948 | 0.941 | 0.943 | 0.883 |
| 34                 | 0.950 | 0.939 | 0.943 | 0.883 |
| 35                 | 0.952 | 0.940 | 0.944 | 0.885 |
| 36                 | 0.948 | 0.940 | 0.943 | 0.883 |
| 37                 | 0.951 | 0.939 | 0.943 | 0.883 |
| 38                 | 0.947 | 0.941 | 0.943 | 0.882 |
| 39                 | 0.949 | 0.942 | 0.944 | 0.885 |
| 40                 | 0.951 | 0.942 | 0.946 | 0.888 |

|    |       |       |       |       |
|----|-------|-------|-------|-------|
| 41 | 0.953 | 0.937 | 0.944 | 0.884 |
| 42 | 0.947 | 0.942 | 0.944 | 0.884 |
| 43 | 0.943 | 0.941 | 0.942 | 0.880 |
| 44 | 0.950 | 0.942 | 0.945 | 0.886 |
| 45 | 0.951 | 0.940 | 0.944 | 0.885 |
| 46 | 0.950 | 0.942 | 0.945 | 0.886 |
| 47 | 0.952 | 0.938 | 0.944 | 0.884 |
| 48 | 0.951 | 0.942 | 0.946 | 0.888 |
| 49 | 0.950 | 0.939 | 0.943 | 0.883 |
| 50 | 0.950 | 0.942 | 0.945 | 0.886 |
| 51 | 0.954 | 0.940 | 0.946 | 0.888 |
| 52 | 0.953 | 0.940 | 0.945 | 0.887 |
| 53 | 0.953 | 0.939 | 0.944 | 0.885 |
| 54 | 0.949 | 0.941 | 0.944 | 0.884 |
| 55 | 0.948 | 0.941 | 0.944 | 0.883 |
| 56 | 0.950 | 0.941 | 0.944 | 0.885 |
| 57 | 0.950 | 0.940 | 0.944 | 0.884 |
| 58 | 0.949 | 0.941 | 0.944 | 0.884 |
| 59 | 0.949 | 0.942 | 0.945 | 0.886 |
| 60 | 0.951 | 0.941 | 0.945 | 0.886 |
| 61 | 0.948 | 0.941 | 0.944 | 0.884 |
| 62 | 0.949 | 0.942 | 0.944 | 0.885 |
| 63 | 0.946 | 0.941 | 0.943 | 0.881 |
| 64 | 0.948 | 0.942 | 0.944 | 0.885 |
| 65 | 0.951 | 0.942 | 0.946 | 0.887 |
| 66 | 0.951 | 0.941 | 0.945 | 0.887 |
| 67 | 0.951 | 0.941 | 0.945 | 0.887 |
| 68 | 0.954 | 0.940 | 0.945 | 0.887 |
| 69 | 0.949 | 0.940 | 0.944 | 0.883 |
| 70 | 0.952 | 0.942 | 0.946 | 0.888 |
| 71 | 0.948 | 0.942 | 0.944 | 0.885 |
