# Supplementary material for: Tissue Expression Difference between mRNAs and lncRNAs
Source: MDPI journal article supplement (doi:10.3390/ijms19113416), 2018-10-31
Supplement: s1 [file s1]

**Table S2.** SNs, SPs, ACCs, and MCCs obtained by the IFS method and RF algorithm.

| Number of features | SN    | SP    | ACC   | MCC   |
|--------------------|-------|-------|-------|-------|
| 4                  | 0.857 | 0.899 | 0.883 | 0.755 |
| 5                  | 0.886 | 0.909 | 0.900 | 0.792 |
| 6                  | 0.898 | 0.915 | 0.908 | 0.809 |
| 7                  | 0.901 | 0.916 | 0.910 | 0.813 |
| 8                  | 0.919 | 0.918 | 0.919 | 0.831 |
| 9                  | 0.922 | 0.917 | 0.919 | 0.833 |
| 10                 | 0.947 | 0.932 | 0.938 | 0.872 |
| 11                 | 0.945 | 0.932 | 0.937 | 0.869 |
| 12                 | 0.948 | 0.933 | 0.939 | 0.874 |
| 13                 | 0.953 | 0.936 | 0.943 | 0.882 |
| 14                 | 0.953 | 0.935 | 0.942 | 0.881 |
| 15                 | 0.953 | 0.937 | 0.943 | 0.883 |
| 16                 | 0.954 | 0.937 | 0.944 | 0.885 |
| 17                 | 0.953 | 0.936 | 0.943 | 0.883 |
| 18                 | 0.954 | 0.936 | 0.943 | 0.883 |
| 19                 | 0.954 | 0.937 | 0.944 | 0.884 |
| 20                 | 0.956 | 0.935 | 0.943 | 0.883 |
| 21                 | 0.956 | 0.937 | 0.944 | 0.886 |
| 22                 | 0.957 | 0.938 | 0.946 | 0.889 |

|    |       |       |       |       |
|----|-------|-------|-------|-------|
| 23 | 0.957 | 0.939 | 0.946 | 0.888 |
| 24 | 0.958 | 0.938 | 0.946 | 0.889 |
| 25 | 0.959 | 0.938 | 0.946 | 0.890 |
| 26 | 0.959 | 0.938 | 0.946 | 0.890 |
| 27 | 0.958 | 0.939 | 0.946 | 0.890 |
| 28 | 0.957 | 0.938 | 0.946 | 0.888 |
| 29 | 0.959 | 0.938 | 0.946 | 0.890 |
| 30 | 0.959 | 0.939 | 0.947 | 0.891 |
| 31 | 0.960 | 0.937 | 0.946 | 0.890 |
| 32 | 0.961 | 0.938 | 0.947 | 0.892 |
| 33 | 0.958 | 0.937 | 0.946 | 0.888 |
| 34 | 0.959 | 0.938 | 0.946 | 0.889 |
| 35 | 0.960 | 0.938 | 0.946 | 0.890 |
| 36 | 0.960 | 0.938 | 0.947 | 0.891 |
| 37 | 0.959 | 0.937 | 0.946 | 0.889 |
| 38 | 0.959 | 0.937 | 0.946 | 0.888 |
| 39 | 0.959 | 0.938 | 0.946 | 0.890 |
| 40 | 0.959 | 0.938 | 0.946 | 0.889 |
| 41 | 0.959 | 0.937 | 0.946 | 0.888 |
| 42 | 0.959 | 0.939 | 0.947 | 0.890 |
| 43 | 0.959 | 0.938 | 0.946 | 0.890 |
| 44 | 0.960 | 0.938 | 0.947 | 0.891 |

|    |       |       |       |       |
|----|-------|-------|-------|-------|
| 45 | 0.962 | 0.938 | 0.948 | 0.893 |
| 46 | 0.961 | 0.941 | 0.949 | 0.894 |
| 47 | 0.962 | 0.939 | 0.948 | 0.893 |
| 48 | 0.960 | 0.940 | 0.948 | 0.893 |
| 49 | 0.960 | 0.940 | 0.948 | 0.892 |
| 50 | 0.959 | 0.939 | 0.947 | 0.891 |
| 51 | 0.962 | 0.939 | 0.948 | 0.893 |
| 52 | 0.963 | 0.939 | 0.949 | 0.894 |
| 53 | 0.963 | 0.940 | 0.949 | 0.895 |
| 54 | 0.963 | 0.939 | 0.949 | 0.894 |
| 55 | 0.961 | 0.938 | 0.947 | 0.892 |
| 56 | 0.960 | 0.939 | 0.947 | 0.892 |
| 57 | 0.961 | 0.938 | 0.947 | 0.891 |
| 58 | 0.961 | 0.939 | 0.947 | 0.892 |
| 59 | 0.962 | 0.939 | 0.948 | 0.894 |
| 60 | 0.959 | 0.940 | 0.947 | 0.892 |
| 61 | 0.962 | 0.940 | 0.949 | 0.895 |
| 62 | 0.961 | 0.938 | 0.947 | 0.891 |
| 63 | 0.963 | 0.938 | 0.948 | 0.893 |
| 64 | 0.960 | 0.939 | 0.947 | 0.892 |
| 65 | 0.961 | 0.938 | 0.947 | 0.891 |
| 66 | 0.958 | 0.937 | 0.946 | 0.888 |

|    |       |       |       |       |
|----|-------|-------|-------|-------|
| 67 | 0.961 | 0.938 | 0.947 | 0.890 |
| 68 | 0.959 | 0.938 | 0.947 | 0.890 |
| 69 | 0.959 | 0.940 | 0.947 | 0.892 |
| 70 | 0.960 | 0.940 | 0.948 | 0.892 |
| 71 | 0.961 | 0.937 | 0.946 | 0.890 |
